# Supplementary material for: Susceptibility Trends of Respiratory and Enteric Porcine Pathogens to Last Resource Antimicrobials
Source: Preprints.org preprint supplement (doi:10.20944/preprints202309.0891.v1), 2023-09-14
Supplement: Supplementary file 1 [file supplementary]

Additional figure 1

Percentage of *Salmonella spp* strains belonging to antimicrobial susceptibility category 1 (open circle), category 2 (open squares), category 3 (open diamond) and category 4 (open triangle) for colistin being category 1 the most susceptible and category 4 the less susceptible one.
